# Supplementary material for: Association of Thoracic Skeletal Muscle Index with Clinical Outcome and Response to Nutritional Interventions in Patients at Risk of Malnutrition—Secondary Analysis of a Randomized Trial
Source: MDPI journal article supplement (doi:10.3390/nu15040817), 2023-02-05
Supplement: s1 [file s1]

**Supplementary Table S1.** Association of low SMI at level L3 and clinical outcomes compared

|                                                            | high SMI at level L3                    | low SMI at level L3                   |                                                                                                                                                                | AUC  |
|------------------------------------------------------------|-----------------------------------------|---------------------------------------|----------------------------------------------------------------------------------------------------------------------------------------------------------------|------|
|                                                            | <i>n</i> (%) of Patients with high SMI* | <i>n</i> (%) of Patients with low SMI | OR or Coefficient (95% CI)                                                                                                                                     |      |
|                                                            |                                         |                                       | p value, adjusted for age, BMI, nutritional support intervention, contributing center, presence of stroke, COPD, hypertension, diabetes, chronic heart failure |      |
|                                                            | <i>n</i> = 388                          | <i>n</i> = 131                        |                                                                                                                                                                |      |
| <b>Primary endpoint</b>                                    |                                         |                                       |                                                                                                                                                                |      |
| <b>Adverse clinical outcome within 30 days</b>             | 113 (29.1%)                             | 39 (29.8%)                            | 1.1 (0.68, 1.79), <i>p</i> = 0.680                                                                                                                             | 0.50 |
| <b>Short-term endpoints</b>                                |                                         |                                       |                                                                                                                                                                |      |
| <b>30-day all-cause mortality</b>                          | 36 (9.3%)                               | 16 (12.2%)                            | 1.61 (0.79, 3.28), <i>p</i> = 0.192                                                                                                                            | 0.53 |
| <b>Rehospitalisation within 30 days</b>                    | 48 (12.4%)                              | 13 (9.9%)                             | 0.77 (0.38, 1.56), <i>p</i> = 0.470                                                                                                                            | 0.48 |
| <b>Mean length of stay, days (SD)</b>                      | 10.1 (7.1)                              | 10.1 (7.1)                            | -0.02 (-2.55, 1.49), <i>p</i> = 0.974                                                                                                                          | -    |
| <b>Decline Barthel index score (points)) after 30 days</b> | 59 (15.2%)                              | 20(15.3%)                             | 1.09 (0.58, 2.05), <i>p</i> = 0.771                                                                                                                            | 0.50 |
| <b>Long-term endpoints</b>                                 |                                         |                                       |                                                                                                                                                                |      |
| <b>180-day all-cause mortality</b>                         | 126 (32.5%)                             | 40 (30.5%)                            | 0.98 (0.54, 1.46) <i>p</i> = 0.660                                                                                                                             | 0.49 |

Abbreviations: SD denotes standard deviation; OR denotes odds ratio; CI denotes confidence interval; AUC denotes area under the curve

**Supplementary Table S2.** Association of low SMI and clinical outcomes in different subgroups

|                                                             | high SMI                               | low SMI                               |                                            | AUC  | Male                                   | Female                                  | NRS ≥ 4                                 | NRS < 4                                  | Age ≥ 80 years                          | Age < 80 years                         |
|-------------------------------------------------------------|----------------------------------------|---------------------------------------|--------------------------------------------|------|----------------------------------------|-----------------------------------------|-----------------------------------------|------------------------------------------|-----------------------------------------|----------------------------------------|
|                                                             | <i>n</i> (%) of patients with high SMI | <i>n</i> (%) of patients with low SMI | OR or *Coefficient (95% CI)                |      | OR or Coefficient (95% CI)             | OR or Coefficient (95% CI)              | OR or Coefficient (95% CI)              | OR or Coefficient (95% CI)               | OR or Coefficient (95% CI)              | OR or Coefficient (95% CI)             |
|                                                             |                                        |                                       | <i>p</i> value, adjusted                   |      | <i>p</i> value, adjusted               | <i>p</i> value, adjusted                | <i>p</i> value, adjusted                | <i>p</i> value, adjusted                 | <i>p</i> value, adjusted                | <i>p</i> value, adjusted               |
|                                                             | <i>n</i> = 496                         | <i>n</i> = 167                        |                                            |      |                                        |                                         |                                         |                                          |                                         |                                        |
| <b>Primary endpoint</b>                                     |                                        |                                       |                                            |      |                                        |                                         |                                         |                                          |                                         |                                        |
| <b>Adverse clinical outcome within 30 days</b>              | 135 (27.2%)                            | 52 (31.1%)                            | 1.6 (1.03 to 2.5),<br><i>p</i> = 0.037     | 0.52 | 1.58 (0.87, 2.87),<br><i>p</i> = 0.131 | 1.1 (0.56, 2.16),<br><i>p</i> = 0.775   | 1.48 (0.89, 2.44),<br><i>p</i> = 0.13   | 0.93 (0.41, 2.13),<br><i>p</i> = 0.873   | 1.73 (0.74, 4.02),<br><i>p</i> = 0.203  | 1.16 (0.73, 1.83),<br><i>p</i> = 0.533 |
| <b>Short-term endpoints</b>                                 |                                        |                                       |                                            |      |                                        |                                         |                                         |                                          |                                         |                                        |
| <b>30-day all-cause mortality</b>                           | 45 ( 9.1%)                             | 19 (11.4%)                            | 1.63 (0.83 to 3.21),<br><i>p</i> = 0.158   | 0.52 | 2.19 (0.92, 5.21),<br><i>p</i> = 0.076 | 1.21 (0.41, 3.58),<br><i>p</i> = .737   | 1.85 (0.88, 3.92),<br><i>p</i> = 0.106  | 1.19 (0.31, 4.57),<br><i>p</i> = 0.805   | 3.33 (1.02, 10.86),<br><i>p</i> = 0.046 | 1.12 (0.54, 2.32),<br><i>p</i> = 0.762 |
| <b>Rehospitalisation within 30 days</b>                     | 53 (10.7%)                             | 19 (11.4%)                            | 1.22 (0.65 to 2.29),<br><i>p</i> = 0.534   | 0.51 | 0.79 (0.33, 1.88),<br><i>p</i> = 0.589 | 1.33 (0.53, 3.37),<br><i>p</i> = 0.545  | 0.98 (0.47, 2.06),<br><i>p</i> = 0.967  | 1.2 (0.41, 3.5),<br><i>p</i> = 0.743     | 0.98 (0.23, 4.19),<br><i>p</i> = 0.98   | 1 (0.54, 1.87),<br><i>p</i> = 0.99     |
| <b>Mean length of stay, days (SD)</b>                       | 10.0 (6.9)                             | 10.1 (7.5)                            | -0.23 (-1.62 to 1.16),<br><i>p</i> = 0.743 | -    | 0.28 (-1.7, 2.27),<br><i>p</i> = 0.779 | 0.26 (-1.65, 2.17),<br><i>p</i> = 0.789 | 1.02 (-0.64, 2.68),<br><i>p</i> = 0.229 | -1.72 (-3.89, 0.45),<br><i>p</i> = 0.119 | -0.2 (-2.67, 2.28),<br><i>p</i> = 0.876 | 0.32 (-1.16, 1.81),<br><i>p</i> = 0.67 |
| <b>Decline Barthel's Index score (points) after 30 days</b> | 68 (13.7%)                             | 29 (17.4%)                            | 1.5 (0.85 to 2.66),<br><i>p</i> = 0.161    | 0.53 | 2.02 (0.96, 4.26),<br><i>p</i> = 0.065 | 1.47 (0.61, 3.54),<br><i>p</i> = 0.393  | 1.67 (0.88, 3.18),<br><i>p</i> = 0.117  | 1.47 (0.53, 4.07),<br><i>p</i> = 0.463   | 3.6 (1.33, 9.78),<br><i>p</i> = 0.012   | 1.07 (0.58, 2),<br><i>p</i> = 0.823    |
| <b>Long-term endpoint</b>                                   |                                        |                                       |                                            |      |                                        |                                         |                                         |                                          |                                         |                                        |
| <b>180-day all-cause mortality</b>                          | 147 (29.6%)                            | 47 (28.1%)                            | 0.82 (0.5 to 1.35),<br><i>p</i> = 0.445    | 0.49 | 1.03 (0.56, 1.89),<br><i>p</i> = 0.929 | 1.22 (0.6, 2.47),<br><i>p</i> = 0.579   | 1.09 (0.65, 1.83),<br><i>p</i> = 0.745  | 0.88 (0.35, 2.21),<br><i>p</i> = 0.79    | 0.73 (0.32, 1.68),<br><i>p</i> = 0.457  | 1.06 (0.66, 1.7),<br><i>p</i> = 0.816  |

Abbreviations: SD denotes standard deviation; OR denotes odds ration; AUC denotes area under the curve; BMI denotes body mass index; NRS denotes nutritional risk screening 2002

*P* values were adjusted for important confounders including age, BMI, nutritional support intervention, contributing center, presence of stroke, COPD, hypertension, diabetes, chronic heart failure

**Supplementary Table S3.** Effects of nutritional support on clinical outcomes of patients in the lowest and in the other three quartiles of SMI at level L3

|                                         | high SMI                           |                                         |                                                        | low SMI                           |                                        |                                                        |                             |
|-----------------------------------------|------------------------------------|-----------------------------------------|--------------------------------------------------------|-----------------------------------|----------------------------------------|--------------------------------------------------------|-----------------------------|
|                                         | Control group<br>( <i>n</i> = 177) | Intervention group<br>( <i>n</i> = 211) | OR or Coefficient (95% CI), <i>p</i><br>value adjusted | Control<br>group ( <i>n</i> = 67) | Intervention<br>group ( <i>n</i> = 64) | OR or Coefficient (95% CI),<br><i>p</i> value adjusted | <i>p</i> for<br>interaction |
| <b>Primary endpoint</b>                 |                                    |                                         |                                                        |                                   |                                        |                                                        |                             |
| Adverse clinical outcome within 30 days | 55 (31.1%)                         | 58 (27.5%)                              | 0.84 (0.54, 1.30), <i>p</i> = 0.439                    | 24 (36%)                          | 15 (23%)                               | 0.55 (0.26, 1.18), <i>p</i> = 0.123                    | 0.65                        |
| <b>Short-term endpoints</b>             |                                    |                                         |                                                        |                                   |                                        |                                                        |                             |
| 30-day all-cause mortality              | 20 (11.3%)                         | 16 (7.6%)                               | 0.64 (0.32, 1.28), <i>p</i> = 0.212                    | 10 (15%)                          | 6 (9%)                                 | 0.59 (0.20, 1.73), <i>p</i> = 0.336                    | 0.91                        |
| Rehospitalisation within 30 days        | 21 (11.9%)                         | 27 (12.8%)                              | 1.09 (0.59, 2.00), <i>p</i> = 0.781                    | 7 (10%)                           | 6 (9%)                                 | 0.89 (0.28, 2.79), <i>p</i> = 0.837                    | 0.81                        |
| Length of hospital stay                 | 10.1 (6.5)                         | 10.1 (7.5)                              | 0.48 (-1.37, 1.46), <i>p</i> = 0.947                   | 11.1 (7.6)                        | 9.0 (6.4)                              | -2.08 (-4.52, 0.36), <i>p</i> = 0.094                  |                             |
| Decline Barthel index Score             | 35 (18.8%)                         | 24 (11.4%)                              | 0.52 (0.29, 0.91), <i>p</i> = 0.023                    | 15 (22%)                          | 5 (8%)                                 | 0.29 (0.09, 0.86), <i>p</i> = 0.026                    | 0.56                        |
| <b>Long-term endpoints</b>              |                                    |                                         |                                                        |                                   |                                        |                                                        |                             |
| 180-day all-cause mortality             | 58 (32.8%)                         | 68 (32.2%)                              | 0.97 (0.63, 1.49), <i>p</i> = 0.910                    | 25 (37%)                          | 15 (23%)                               | 0.51 (0.24, 1.10), <i>p</i> = 0.087                    | 0.52                        |

Abbreviations: OR denotes odds ratio; CI denotes Confidence Interval

*P* values were adjusted for important confounders including age, BMI, nutritional support intervention, contributing center, presence of stroke, COPD, hypertension, diabetes, chronic heart failure
